# Supplementary material for: Synthesis, properties, and magnetism–structure relationship of lanthanide-based metal–organic frameworks with (ethylenedithio)acetic acid
Source: Royal Society of Chemistry journal article supplement (doi:10.1039/c4ce00573b), 2014-05-10
Supplement: c4ce00573b1.pdf [file c4ce00573b1.pdf]

# Synthesis, Properties, Magnetism-Structure Relation of Lanthanide-based Metal-Organic Frameworks with (Ethylenedithio) Acetic Acid

Gui-lin Zhuang, Li Tan, Wu-lin Chen, Jia-qi Bai, Xing Zhong, Jian-guo Wang\*

*Institute of Industrial Catalysis, College of Chemical Engineering and Materials Science,*

*Zhejiang University of Technology, Hangzhou, People's Republic of China, 310032.*

Fax: (+86)571-88871037 Tel: (+86)571-88871037

E-mail: [jgw@zjut.edu.cn](mailto:jgw@zjut.edu.cn)

## 1. Bond length and bond angle of compounds 1-5

Table S1 Bond lengths and angle of compounds 1-5

| Compound 1                                                     |            |                     |            |
|----------------------------------------------------------------|------------|---------------------|------------|
| La(1)-O(4)                                                     | 2.520(2)   | La(1)-O(2W)         | 2.535(3)   |
| La(1)-O(1)#1                                                   | 2.530(2)   | La(1)-O(1W)         | 2.553(3)   |
| La(1)-O(3)#2                                                   | 2.564(2)   | La(1)-O(6)          | 2.616(2)   |
| La(1)-O(2)#3                                                   | 2.596(2)   | La(1)-O(5)          | 2.639(3)   |
| La(1)-O(1)#3                                                   | 2.747(2)   | La(1)-O(4)#2        | 2.912(3)   |
| O(4)-La(1)-O(1)#1                                              | 148.91(8)  | O(1)#1-La(1)-O(2W)  | 139.14(8)  |
| O(4)-La(1)-O(2W)                                               | 71.82(9)   | O(4)-La(1)-O(1W)    | 138.53(9)  |
| O(1)#1-La(1)-O(1W)                                             | 72.54(9)   | O(4)-La(1)-O(3)#2   | 108.67(8)  |
| O(2W)-La(1)-O(1W)                                              | 67.00(8)   | O(1)#1-La(1)-O(3)#2 | 76.27(8)   |
| O(2W)-La(1)-O(3)#2                                             | 87.94(9)   | O(4)-La(1)-O(2)#3   | 79.35(8)   |
| O(1W)-La(1)-O(3)#2                                             | 75.02(10)  | O(1)#1-La(1)-O(2)#3 | 108.74(7)  |
| O(2W)-La(1)-O(2)#3                                             | 73.20(9)   | O(3)#2-La(1)-O(2)#3 | 156.36(10) |
| O(1W)-La(1)-O(2)#3                                             | 84.37(10)  | O(4)-La(1)-O(6)     | 74.40(8)   |
| O(1)#1-La(1)-O(6)                                              | 77.30(8)   | O(1W)-La(1)-O(6)    | 142.20(9)  |
| O(2W)-La(1)-O(6)                                               | 135.38(8)  | O(3)#2-La(1)-O(6)   | 76.12(8)   |
| Symmetry code: #1 x,y,z-1; #2 -x+3,-y+1,-z-1; #3 -x+2,-y+1,-z; |            |                     |            |
| Compound 2                                                     |            |                     |            |
| Nd(1)-O(3)                                                     | 2.439(3)   | Nd(1)-O(1W)         | 2.496(3)   |
| Nd(1)-O(2)#1                                                   | 2.468(3)   | Nd(1)-O(1)#3        | 2.531(3)   |
| Nd(1)-O(2W)                                                    | 2.486(3)   | Nd(1)-O(5)          | 2.563(3)   |
| Nd(1)-O(4)#2                                                   | 2.491(3)   | Nd(1)-O(6)          | 2.586(3)   |
| Nd(1)-O(2)#3                                                   | 2.735(3)   |                     |            |
| O(3)-Nd(1)-O(2)#1                                              | 148.59(10) | O(2W)-Nd(1)-O(1W)   | 67.68(10)  |
| O(3)-Nd(1)-O(2W)                                               | 71.60(10)  | O(4)#2-Nd(1)-O(1W)  | 76.15(11)  |
| O(2)#1-Nd(1)-O(2W)                                             | 139.51(9)  | O(3)-Nd(1)-O(1)#3   | 79.37(10)  |
| O(3)-Nd(1)-O(4)#2                                              | 106.39(9)  | O(2)#1-Nd(1)-O(1)#3 | 109.43(8)  |
| O(2)#1-Nd(1)-O(4)#2                                            | 78.20(9)   | O(2W)-Nd(1)-O(1)#3  | 74.14(10)  |

---

Symmetry code: #1 x,y,z-1; #2 -x+2,-y,-z; #3 -x+1,-y,-z+1;

### Compound 3

|                     |            |                   |            |
|---------------------|------------|-------------------|------------|
| Eu(1)-O(2)#1        | 2.356(4)   | Eu(1)-O(4)        | 2.472(4)   |
| Eu(1)-O(3)#2        | 2.406(4)   | Eu(1)-O(6)        | 2.512(4)   |
| Eu(1)-O(1W)         | 2.422(5)   | Eu(1)-O(5)        | 2.530(4)   |
| Eu(1)-O(2W)         | 2.422(5)   | Eu(1)-O(3)        | 2.735(4)   |
| Eu(1)-O(1)#3        | 2.433(4)   |                   |            |
| O(2)#1-Eu(1)-O(3)#2 | 148.14(15) | O(2)#1-Eu(1)-O(4) | 79.53(14)  |
| O(2)#1-Eu(1)-O(1W)  | 139.05(18) | O(3)#2-Eu(1)-O(4) | 110.07(13) |
| O(3)#2-Eu(1)-O(1W)  | 72.81(16)  | O(1W)-Eu(1)-O(4)  | 83.98(17)  |
| O(2)#1-Eu(1)-O(2W)  | 71.37(18)  | O(2W)-Eu(1)-O(4)  | 75.08(16)  |
| O(3)#2-Eu(1)-O(2W)  | 139.93(17) | O(1)#3-Eu(1)-O(4) | 154.97(15) |
| O(1W)-Eu(1)-O(2W)   | 68.22(19)  | O(2)#1-Eu(1)-O(6) | 73.15(14)  |
| O(2)#1-Eu(1)-O(1)#3 | 103.91(14) | O(3)#2-Eu(1)-O(6) | 78.10(13)  |
| O(3)#2-Eu(1)-O(1)#3 | 80.33(13)  | O(1W)-Eu(1)-O(6)  | 141.67(16) |

Symmetry code: #1 -x+1,-y+1,-z+2; #2 -x+1,-y+1,-z+1; #3 x+1,y,z-1

### Compound 4

|                     |            |                   |            |
|---------------------|------------|-------------------|------------|
| Gd(1)-O(2)#1        | 2.329(3)   | Gd(1)-O(4)        | 2.457(3)   |
| Gd(1)-O(3)#2        | 2.392(3)   | Gd(1)-O(6)        | 2.505(3)   |
| Gd(1)-O(1W)         | 2.403(3)   | Gd(1)-O(5)        | 2.530(3)   |
| Gd(1)-O(1)#3        | 2.414(3)   | Gd(1)-O(3)        | 2.732(3)   |
| Gd(1)-O(2W)         | 2.422(3)   |                   |            |
| O(2)#1-Gd(1)-O(3)#2 | 147.79(10) | O(2)#1-Gd(1)-O(4) | 79.63(11)  |
| O(2)#1-Gd(1)-O(1W)  | 139.46(12) | O(3)#2-Gd(1)-O(4) | 110.28(9)  |
| O(3)#2-Gd(1)-O(1W)  | 72.75(11)  | O(1W)-Gd(1)-O(4)  | 83.84(12)  |
| O(2)#1-Gd(1)-O(1)#3 | 102.99(11) | O(1)#3-Gd(1)-O(4) | 154.60(11) |
| O(3)#2-Gd(1)-O(1)#3 | 81.18(9)   | O(2W)-Gd(1)-O(4)  | 75.01(11)  |
| O(1W)-Gd(1)-O(1)#3  | 77.99(12)  | O(2)#1-Gd(1)-O(6) | 72.67(10)  |
| O(2)#1-Gd(1)-O(2W)  | 71.52(12)  | O(3)#2-Gd(1)-O(6) | 78.20(9)   |

Symmetry code: #1 -x+1,-y+1,-z+1; #2 -x+1,-y+1,-z; #3 x+1,y,z-1

### Compound 5

|                     |            |                     |            |
|---------------------|------------|---------------------|------------|
| La(1)-O(5)          | 2.479(3)   | La(1)-O(1W)         | 2.606(3)   |
| La(1)-O(4)#1        | 2.500(3)   | La(1)-O(6)#3        | 2.607(3)   |
| La(1)-O(1)          | 2.545(3)   | La(1)-O(5)#3        | 2.681(3)   |
| La(1)-O(2W)         | 2.563(4)   | La(1)-O(2)#3        | 2.700(3)   |
| La(1)-O(3)#2        | 2.566(3)   | La(1)-O(4)#2        | 2.836(3)   |
| O(5)-La(1)-O(4)#1   | 144.92(9)  | O(2W)-La(1)-O(3)#2  | 72.81(11)  |
| O(5)-La(1)-O(1)     | 69.83(9)   | O(5)-La(1)-O(1W)    | 136.06(10) |
| O(4)#1-La(1)-O(1)   | 145.24(9)  | O(4)#1-La(1)-O(1W)  | 77.11(10)  |
| O(5)-La(1)-O(2W)    | 69.98(11)  | O(1)-La(1)-O(1W)    | 69.88(10)  |
| O(4)#1-La(1)-O(2W)  | 78.65(11)  | O(2W)-La(1)-O(1W)   | 130.88(12) |
| O(1)-La(1)-O(2W)    | 132.07(11) | O(3)#2-La(1)-O(1W)  | 76.70(11)  |
| O(5)-La(1)-O(3)#2   | 75.27(9)   | O(5)-La(1)-O(6)#3   | 119.36(9)  |
| O(4)#1-La(1)-O(3)#2 | 110.43(9)  | O(4)#1-La(1)-O(6)#3 | 78.35(9)   |

---

|                           |                 |                   |           |
|---------------------------|-----------------|-------------------|-----------|
| O(1)-La(1)-O(3)#2         | 72.65(10)       | O(1)-La(1)-O(6)#3 | 80.03(10) |
| Symmetry code: #1 x,y,z-1 | #2 -x-2,-y-2,-z | #3 -x-2,-y-3,-z-1 |           |

## 2. Our QMC fitting program

**Algorithm of our fitting Program:** The quantum Monte Carlo calculations were performed by our fitting program, where we call LOOP module of ALPS and utilize four parameters ( $J$ ,  $g$ ,  $zJ$  and  $TIP$ ) to further fit the experimental result by use of exhaustive-iterative method. The corresponding formulas were shown in Eq(1)-Eq(4). The running procedure of our program is presented in the Figure S1. In the beginning, the range of four parameters ( $J$ ,  $g$ ,  $TIP$ ,  $zJ$ ) were respectively set to that:  $[J_1: J_2]$ ,  $[g_1: g_2]$ ,  $[TIP_1: TIP_2]$ ,  $[zJ_1: zJ_2]$ , and the step sizes were set to  $\Delta J$ ,  $\Delta g$ ,  $\Delta TIP$  and  $\Delta zJ$ . Until the running is over, the best parameters ( $R_b, J_b, g_b, TIP_b, zJ_b$ ) were obtained.

$$\chi_u = \frac{1}{NT} \left\langle \left( \sum_{i=1}^N S_i^z \right)^2 \right\rangle \quad \text{Eq(1)}$$

where uniform magnetic susceptibility  $\chi_u$  is dimensionless.

Convert uniform magnetic susceptibility to  $\chi_T$  ( $\text{cm}^3 \text{mol}^{-1}$ )

$$\chi_T (\text{cm}^3 \text{mol}^{-1}) = Ag^2 \chi_u \quad \text{Eq(2)}$$

where  $g$  is Landé-factor and  $A$  is unit constant.

Import  $zJ$  and  $TIP$  factor to  $\chi_T$ , as bellows:

$$\chi'_T (\text{cm}^3 \text{mol}^{-1}) = \frac{(\chi_T + TIP)}{1 + \frac{zJ(\chi_T + TIP)}{0.1303g^2}} \quad \text{Eq(3)}$$

The reliability factor  $R$  is obtained by

$$R = \frac{\sum (\chi'_T T - \chi_{obs} T)^2}{\sum (\chi_{obs} T)^2} \quad \text{Eq(4)}$$

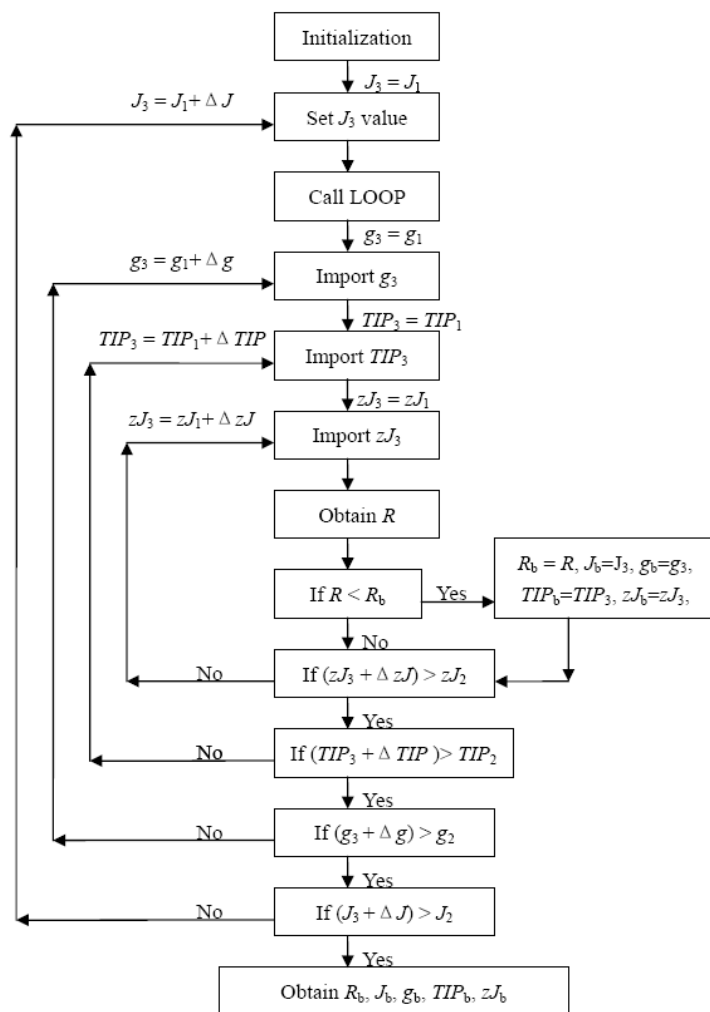

Figure S1 the procedure of our program.

### 3. XRD curves of compounds 1-5

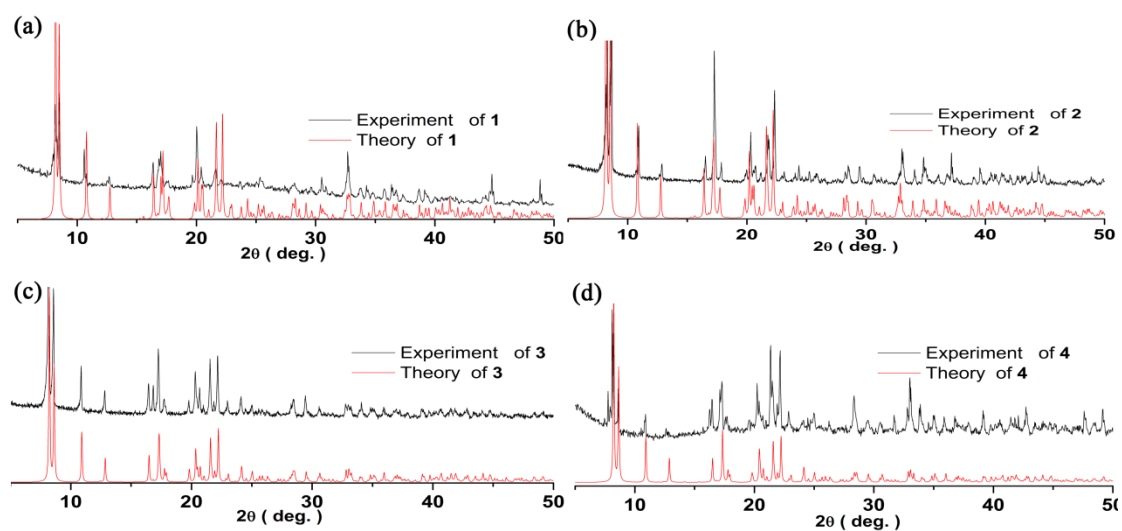

Fig.S2 XRD curves of compounds 1-4.

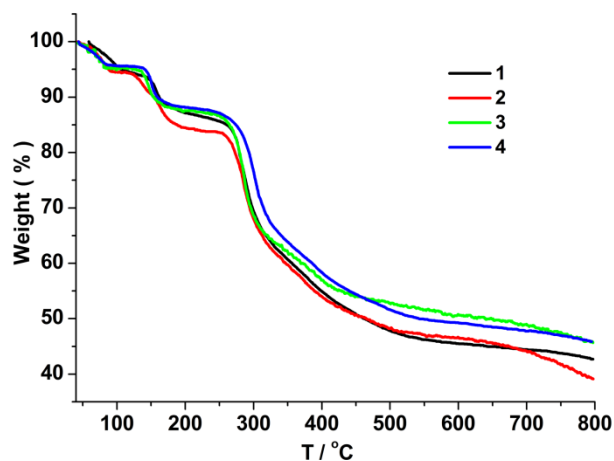

Fig. S3 TGA curve of compounds 1-4 in the range from room temperature to 800 °C.

#### 4. Magnetic properties of 2 and 3.

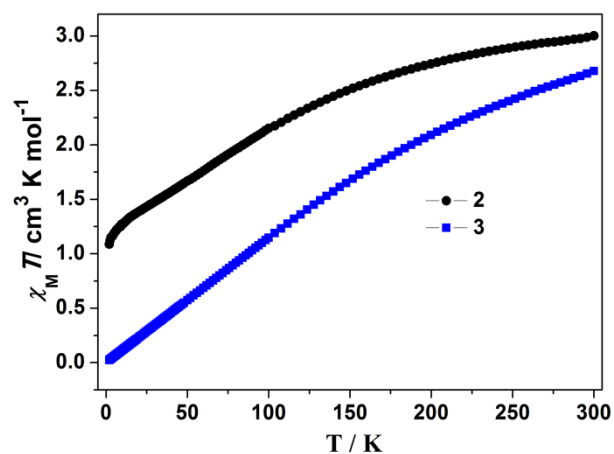

Figure S4  $\chi_m T$  vs T of 2 ( black ) and 3 ( blue ).

#### 5. Lattice constant $a$ vs $U$ plot

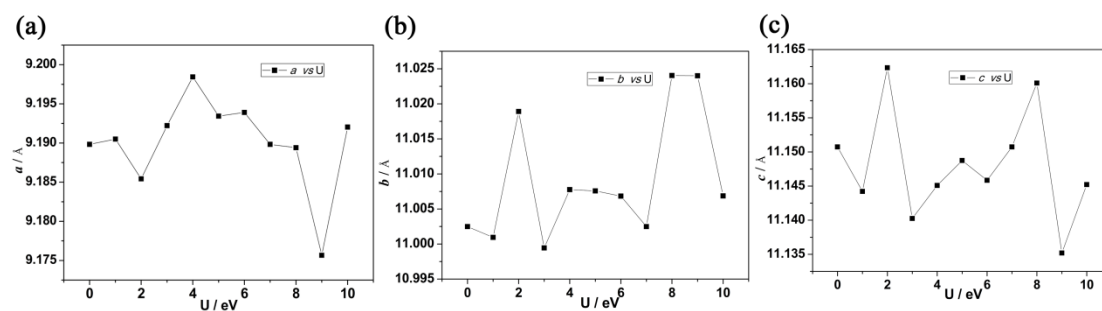

Figure S5 the plot of lattice parameter against U of optimized geometries.

#### 5. PDOS obtained by normal PBE functional

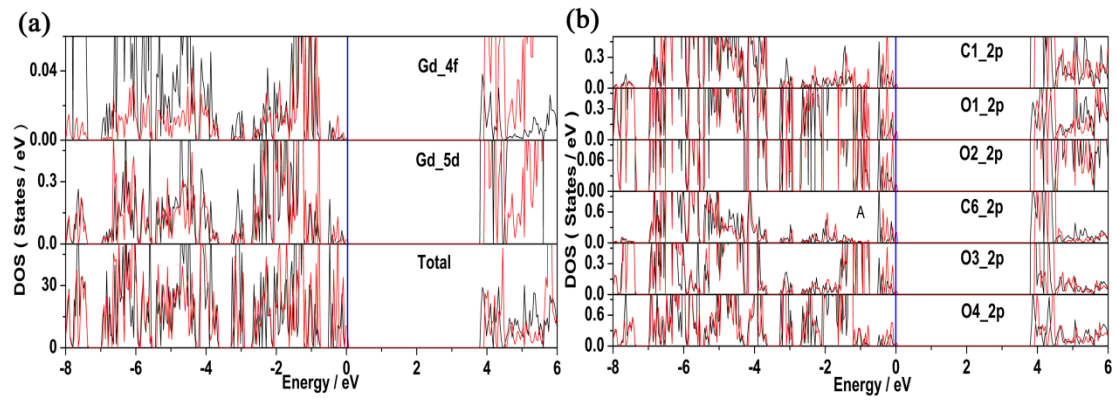

Figure S6 DOS of 4 at the level of PBE functional without VDW-df correction in spin-up (black) and spin-down (red) with Fermi level (blue line).
